# Supplementary material
Source: MDPI journal article supplement (https://www.mdpi.com/2073-4352/13/12/1681)
Supplement: s1 [file s1]

# Supplementary Material

## Fabrication, Crystal Structures, Catalytic and Anti-wear Performance of 3D Zinc(II) and Cadmium(II) Coordination Polymers Based on a Tetracarboxylate Ligand

Zhenghua Zhao <sup>1</sup>, Qin Zhang <sup>1</sup>, Yufeng Liu <sup>1</sup>, Jinzhong Gu <sup>2,\*</sup>, Zifa Shi <sup>2,\*</sup>

<sup>1</sup> Petrochina Lanzhou Lube Oil R&D Institute, Lanzhou, 730060, China; zhaozhenghua\_rhy@petrochina.com.cn (Z.Z.); zhangqinlz\_rhy@petrochina.com.cn (Q.Z.); liuyufeng\_rhy@petrochina.com.cn (Y.L.)

<sup>2</sup> State Key Laboratory of Applied Organic Chemistry and College of Chemistry and Chemical Engineering, Lanzhou University, Lanzhou, 730000, China

\* Correspondence: gujzh@lzu.edu.cn (J.G.), shizf@lzu.edu.cn (Z.S.); Tel.: +86-931-8915196 (J.G.), +86-931-8912500 (Z.S.)

### Contents

|                                                                                                                                                                                                                                                                                                                                                      |     |
|------------------------------------------------------------------------------------------------------------------------------------------------------------------------------------------------------------------------------------------------------------------------------------------------------------------------------------------------------|-----|
| <b>Figure S1.</b> FT-IR spectra of compounds <b>1</b> and <b>2</b> .....                                                                                                                                                                                                                                                                             | S2  |
| <b>Figure S2.</b> PXRD patterns of compounds <b>1</b> and <b>2</b> at room temperature. ....                                                                                                                                                                                                                                                         | S2  |
| <b>Figure S3.</b> The coordination modes of dppa <sup>4-</sup> linkers in this work and previously reported works. ....                                                                                                                                                                                                                              | S3  |
| <b>Figure S4.</b> Example of the integration in the <sup>1</sup> H NMR spectrum of the reaction mixture for the determination of Knoevenagel condensation product (conditions of Table 2, Entry 6).....                                                                                                                                              | S3  |
| <b>Figure S5.</b> Example of the integration in the <sup>1</sup> H NMR spectrum of the reaction mixture for the determination of Knoevenagel condensation product (conditions of Table 2, Entry 8).....                                                                                                                                              | S4  |
| <b>Figure S6.</b> Accumulation of 2-benzylidenemalononitrile vs. time in the Knoevenagel condensation of benzaldehyde with malononitrile catalysed by <b>1</b> (blue dotted line refers to the reaction after removal of the catalyst after 10 min reaction time; see text for details). Reaction conditions are those of Table 2, entries 1–6. .... | S4  |
| <b>Figure S7.</b> Catalyst recycling experiments in the Knoevenagel condensation of benzaldehyde with malononitrile catalysed by <b>1</b> . Reaction conditions are those of Table 2, entry 7. ....                                                                                                                                                  | S5  |
| <b>Figure S8.</b> PXRD patterns for <b>1</b> and <b>2</b> : simulated (red), before (black) and after (blue) catalysis. ....                                                                                                                                                                                                                         | S5  |
| <b>Figure S9.</b> Plausible mechanism for the Knoevenagel condensation reaction catalyzed by <b>1</b> . ....                                                                                                                                                                                                                                         | S5  |
| <b>Figure S10.</b> Fluorescence images of the powder of <b>1</b> under dark-field (a) and bright-field (b); fluorescence images of <b>1</b> /PAO10 under dark-field (c) and bright-field (d). ....                                                                                                                                                   | S6  |
| <b>Figure S11.</b> PXRD patterns for <b>1</b> [simulated (red), powder (black) and powder from <b>1</b> /PAO10 (blue)]. ..                                                                                                                                                                                                                           | S6  |
| <b>Table S1.</b> Reported coordination polymers with dppa <sup>4-</sup> ligand. ....                                                                                                                                                                                                                                                                 | S7  |
| <b>Table S2.</b> Selected bond lengths (Å) and bond angles (°) for compounds <b>1</b> and <b>2</b> . ....                                                                                                                                                                                                                                            | S8  |
| <b>Table S3.</b> Hydrogen bond lengths (Å) and angles (°) of compound <b>2</b> . ....                                                                                                                                                                                                                                                                | S8  |
| <b>Table S4</b> Substrate scope for Zn-catalyzed the Knoevenagel condensation reaction of substituted benzaldehydes with malononitrile <sup>a</sup> .....                                                                                                                                                                                            | S9  |
| <b>Table S5.</b> Comparison of various catalysts for the Knoevenagel condensation reaction between benzaldehyde and propanedinitrile. ....                                                                                                                                                                                                           | S10 |

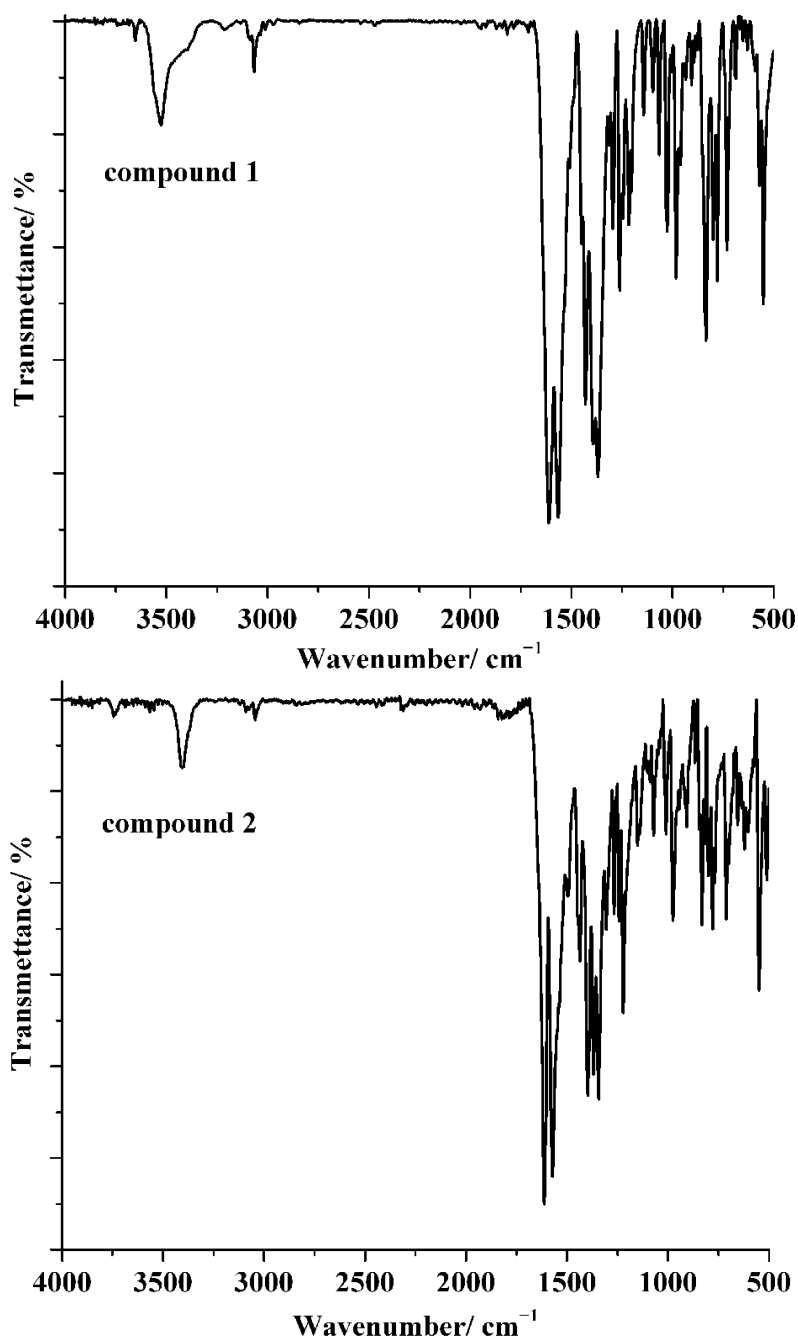

**Figure S1.** FT-IR spectra of compounds 1 and 2.

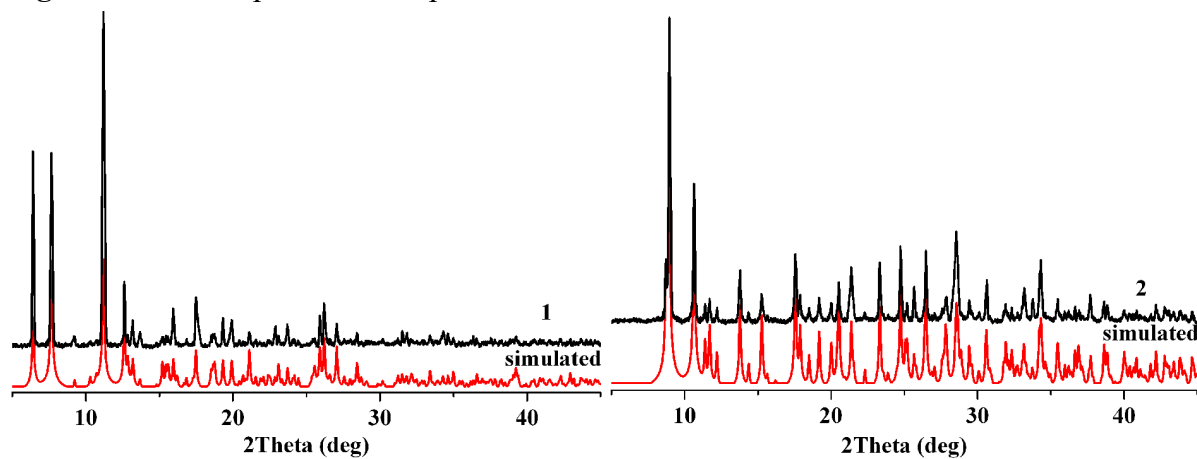

**Figure S2.** PXRD patterns of compounds 1 and 2 at room temperature.

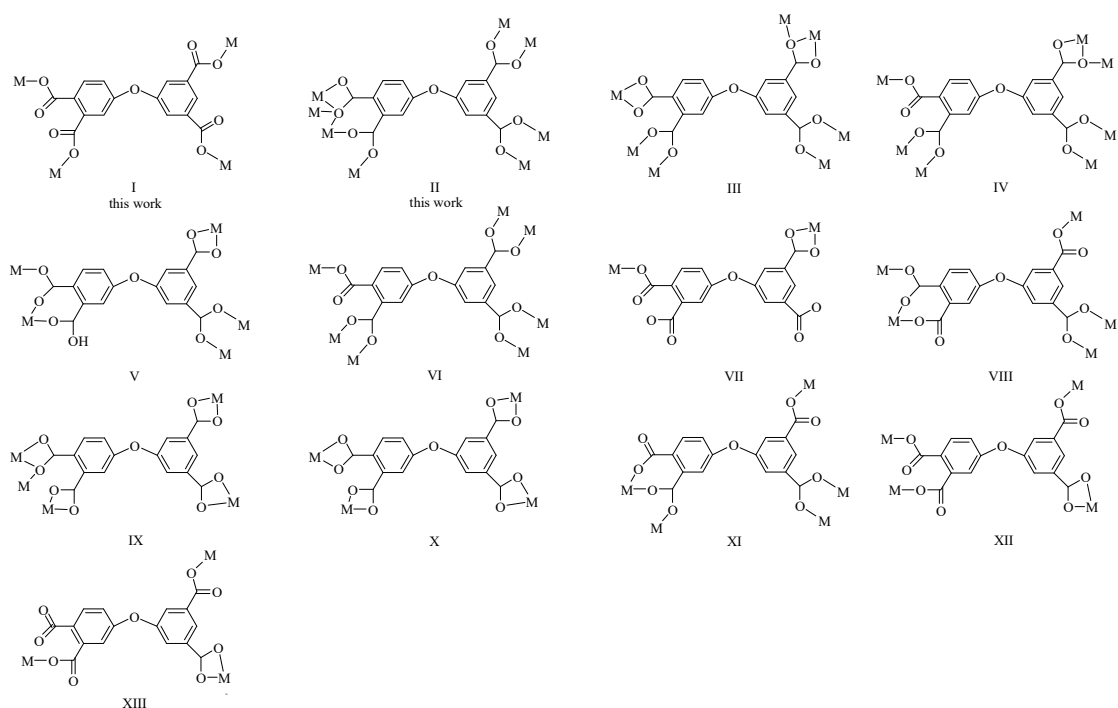

**Figure S3.** The coordination modes of  $\text{dppa}^{4-}$  linkers in this work and previously reported works.

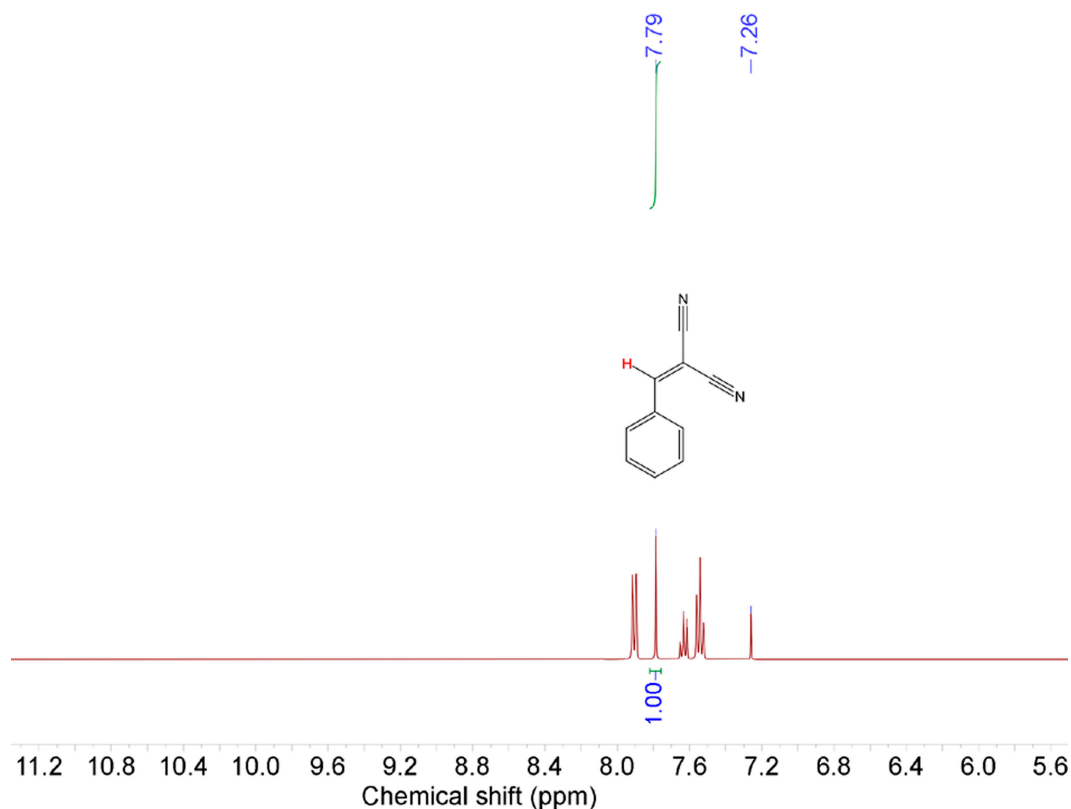

**Figure S4.** Example of the integration in the  $^1\text{H}$  NMR spectrum of the reaction mixture for the determination of Knoevenagel condensation product (conditions of Table 2, Entry 6).

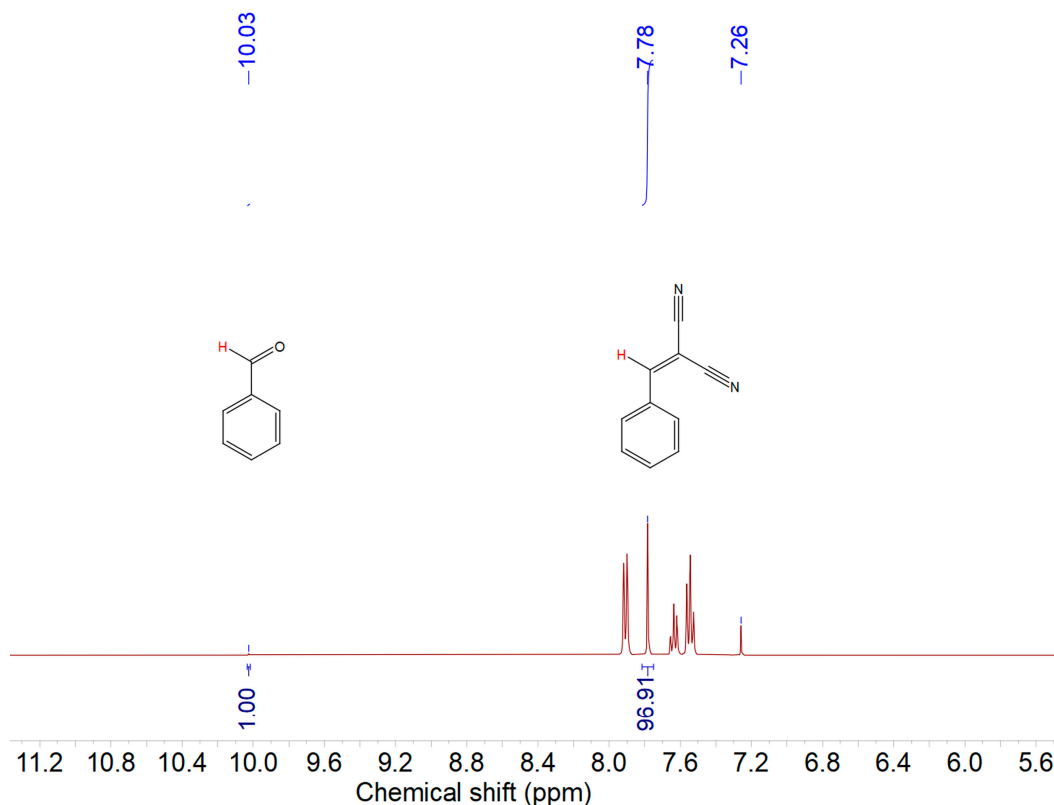

**Figure S5.** Example of the integration in the <sup>1</sup>H NMR spectrum of the reaction mixture for the determination of Knoevenagel condensation product (conditions of Table 2, Entry 8).

*Product yield calculation in the Knoevenagel condensation reaction.* The C(=O)H signal of benzaldehyde (substrate) appears at  $\delta$  10.03 ppm, while 2-benzylidenemalononitrile (product) shows a characteristic signal at  $\delta$  7.78 ppm.

Total integration of both signals: unreacted benzaldehyde + 2-benzylidenemalononitrile = 1.00 + 96.91 = 97.91.

Percentage of the unreacted substrate:  $1/97.91 = 1.02\%$

Conversion of benzaldehyde = yield of 2-benzylidenemalononitrile =  $100 - 1.02 = 98.98\%$ .

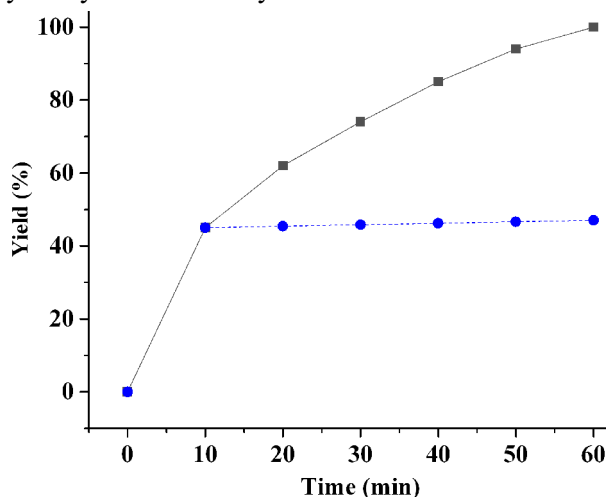

**Figure S6.** Accumulation of 2-benzylidenemalononitrile vs. time in the Knoevenagel condensation of benzaldehyde with malononitrile catalysed by **1** (blue dotted line refers to the reaction after removal of the catalyst after 10 min reaction time; see text for details). Reaction conditions are those of Table 2, entries 1–6.

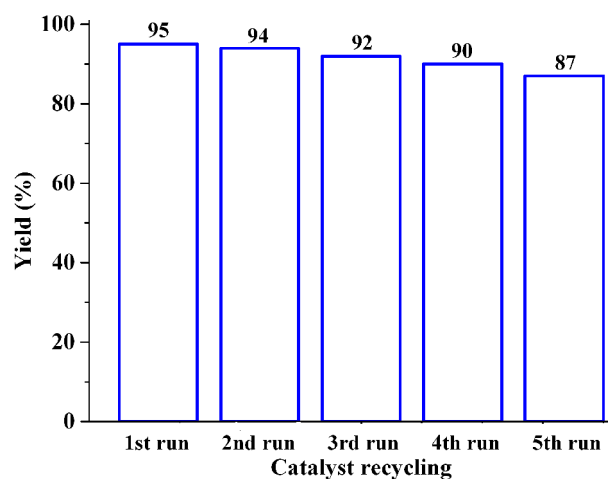

**Figure S7.** Catalyst recycling experiments in the Knoevenagel condensation of benzaldehyde with malononitrile catalysed by **1**. Reaction conditions are those of Table 2, entry 7.

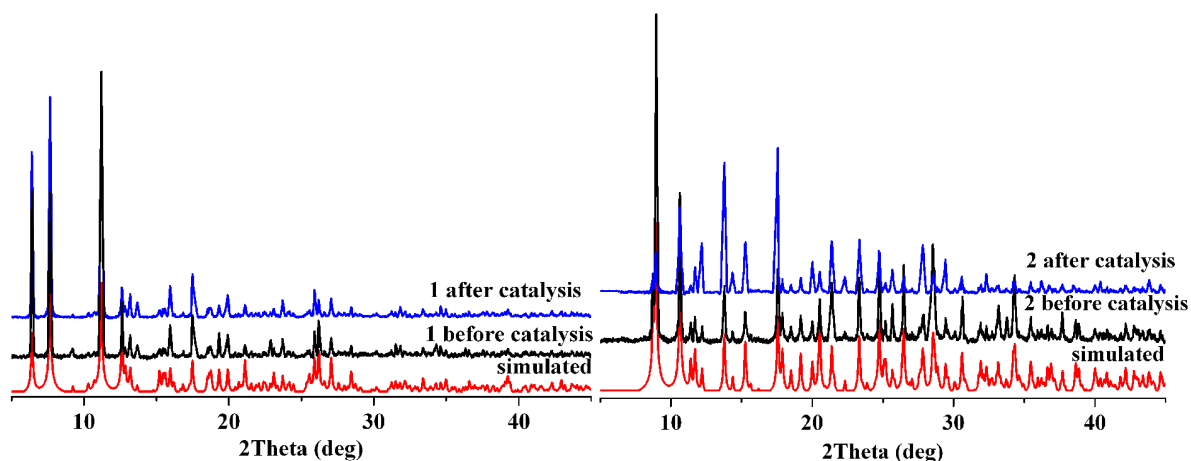

**Figure S8.** PXRD patterns for **1** and **2**: simulated (red), before (black) and after (blue) catalysis.

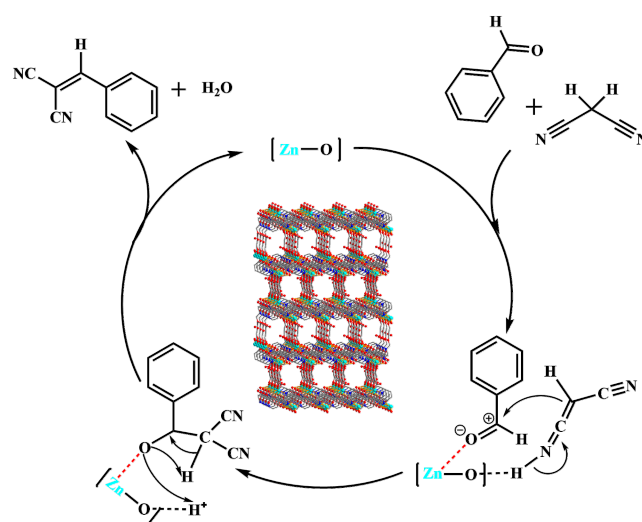

**Figure S9.** Plausible mechanism for the Knoevenagel condensation reaction catalyzed by **1**.

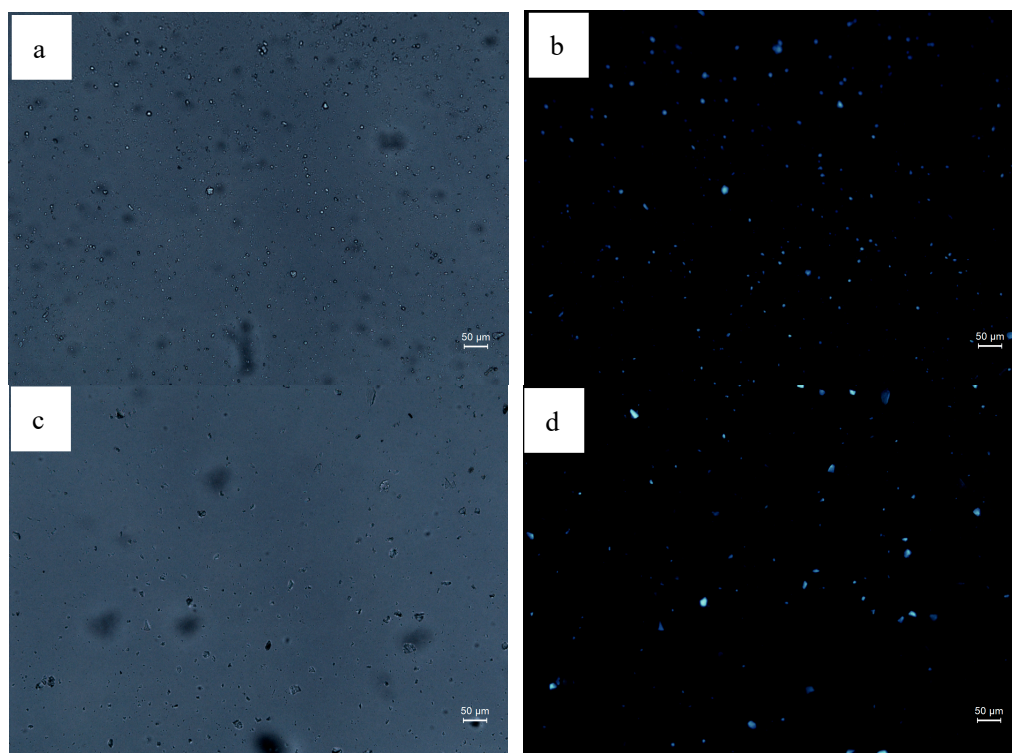

**Figure S10.** Fluorescence images of the powder of **1** under dark-field (a) and bright-field (b); fluorescence images of **1/PAO10** under dark-field (c) and bright-field (d).

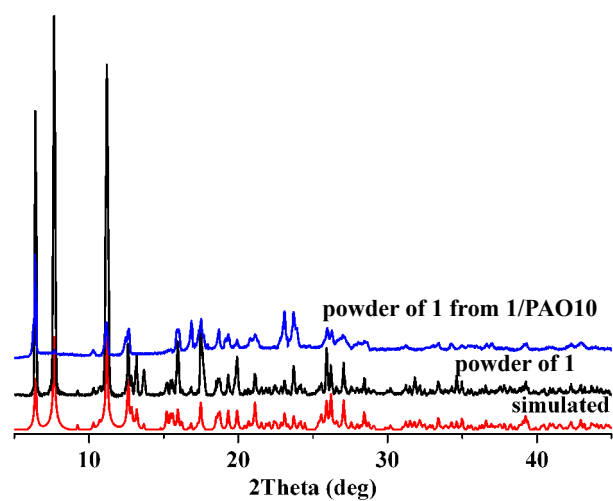

**Figure S11.** PXRD patterns for **1** [simulated (red), powder (black) and powder from **1/PAO10** (blue)].

**Table S1.** Reported coordination polymers with  $\text{dppa}^{4-}$  ligand.

| Compound                                                                                                                  | Coordination mode of $\text{H}_4\text{dppa}$  | Structure  | Properties              | Ref. |
|---------------------------------------------------------------------------------------------------------------------------|-----------------------------------------------|------------|-------------------------|------|
| $[\text{Cd}_2(\text{dppa})(\text{H}_2\text{O})_5]_n$                                                                      | $\mu 5$ - mode IX, Figure S3                  | 3D network | Luninescent property    | 21   |
| $\{[\text{Cu}_3(\text{dppa})_2(\mu\text{-OH})_2(\text{H}_2\text{O})_4] \cdot 2\text{H}_2\text{O}\}_n$                     | $\mu 7$ - mode VI, Figure S3                  | 3D network | Magnetic property       | 21   |
| $\{[\text{Cd}_2(\text{dppa})(4,4\text{-bipy})_2(\text{H}_2\text{O})_3] \cdot 2\text{H}_2\text{O}\}_n$                     | $\mu 4$ - mode X, Figure S3                   | 2D sheet   | Luninescent property    | 21   |
| $[\text{Zn}_2(\text{dppa})(4,4\text{-bipy})_2(\text{H}_2\text{O})_3]_n$                                                   | $\mu 5$ - mode VIII, Figure S3                | 3D network | Luninescent property    | 21   |
| $\{[\text{Ni}_7(\text{dppa})_4(4,4\text{-bipy})_{12}(\text{H}_2\text{O})_{12}] \cdot 2\text{H}_2\text{O}\}_n$             | $\mu 4$ -/ $\mu 3$ - mode XII/XIII, Figure S3 | 3D network | Magnetic property       | 21   |
| $\{[\text{Cu}_5(\text{dppa})_2(\mu\text{-OH})_2(\text{H}_2\text{O})_4] \cdot \text{DMF} \cdot 10.5\text{H}_2\text{O}\}_n$ | $\mu 7$ - mode VI, Figure S3                  | 3D network | Catalytic degrades dyes | 22   |
| $[\text{Cd}_2(\text{dppa})]_n$                                                                                            | $\mu 7$ - mode IV, Figure S3                  | 3D network | Luninescent property    | 26   |
| $[\text{Zn}_2(\text{dppa})(\text{bpy})]_n$                                                                                | $\mu 7$ - mode III, Figure S3                 | 3D network | fluorescent probe       | 27   |
| $\{[\text{Mn}_2(\text{dppa})(\text{phen})_2] \cdot 5\text{H}_2\text{O}\}_n$                                               | $\mu 5$ - mode XI, Figure S3                  | 2D sheet   | Magnetic property       | 25   |
| $\{[\text{Zn}_2(\text{dppa})(\text{py})] \cdot \text{H}_2\text{O}\}_n$                                                    | $\mu 6$ - mode V, Figure S3                   | 2D sheet   | Luninescent property    | 25   |
| $[\text{Co}_2(\text{dppa})(4,4\text{-bipy})_2(\text{H}_2\text{O})_3]_n$                                                   | $\mu 5$ - mode VIII, Figure S3                | 3D network | Magnetic property       | 23   |
| $\{[\text{Co}_2(\text{H}_2\text{dppa})(4,4\text{-bipy})(\text{H}_2\text{O})_4] \cdot 2\text{H}_2\text{O}\}_n$             | $\mu 2$ - mode VII, Figure S3                 | 3D network | Magnetic property       | 24   |

**Table S2.** Selected bond lengths (Å) and bond angles (°) for compounds **1** and **2**.

| <b>1</b>            |            |                      |            |                       |            |
|---------------------|------------|----------------------|------------|-----------------------|------------|
| Zn(1)-O(2)          | 1.907(4)   | Zn(1)-O(7)i          | 1.907(4)   | Zn(1)-O(10)           | 1.947(4)   |
| Zn(1)-N(1)          | 2.032(4)   | Zn(2)-O(3)iii        | 1.991(4)   | Zn(2)-O(8)iii         | 1.959(4)   |
| Zn(2)-O(10)         | 1.931(4)   | Zn(2)-N(2)iv         | 2.067(4)   |                       |            |
| O(2)-Zn(1)-O(10)    | 106.97(19) | O(2)-Zn(1)-O(7)i     | 112.96(18) | O(7)i-Zn(1)-O(10)     | 105.86(15) |
| O(2)-Zn(1)-N(1)     | 118.52(18) | N(1)-Zn(1)-O(10)     | 113.91(18) | O(7)i-Zn(1)-N(1)      | 97.85(16)  |
| O(8)iii-Zn(2)-O(10) | 123.10(16) | O(3)ii-Zn(2)-O(10)   | 104.61(16) | O(3)ii-Zn(2)-O(8)iii  | 114.94(17) |
| N(2)iv-Zn(2)-O(10)  | 113.1(2)   | O(8)iii-Zn(2)-N(2)iv | 100.89(18) | O(3)ii-Zn(2)-N(2)iv   | 97.35(18)  |
| <b>2</b>            |            |                      |            |                       |            |
| Cd(1)-O(2)          | 2.256(2)   | Cd(1)-O(3)i          | 2.298(2)   | Cd(1)-O(7)ii          | 2.288(3)   |
| Cd(1)-O(8)iii       | 2.304(2)   | Cd(1)-O(9)iii        | 2.650(2)   | Cd(1)-N(1)            | 2.294(3)   |
| Cd(2)-O(1)iv        | 2.230(3)   | Cd(2)-O(4)           | 2.215(3)   | Cd(2)-O(6)v           | 2.260(3)   |
| Cd(2)-O(9)v         | 2.502(2)   | Cd(2)-O(9)vi         | 2.371(2)   | Cd(2)-O(10)           | 2.250(3)   |
| O(7)ii-Cd(1)-O(2)   | 112.79(10) | N(1)-Cd(1)-O(2)      | 87.15(10)  | O(7)ii-Cd(1)-N(1)     | 100.27(10) |
| O(3)i-Cd(1)-O(2)    | 165.12(11) | O(7)ii-Cd(1)-O(3)i   | 81.84(11)  | O(3)i-Cd(1)-N(1)      | 87.52(11)  |
| O(8)iii-Cd(1)-O(2)  | 85.43(10)  | O(7)ii-Cd(1)-O(8)iii | 140.21(9)  | O(8)iii-Cd(1)-N(1)    | 116.30(10) |
| O(3)i-Cd(1)-O(8)iii | 84.50(10)  | O(2)-Cd(1)-O(9)iii   | 96.97(8)   | O(7)ii-Cd(1)-O(9)iii  | 89.26(9)   |
| N(1)-Cd(1)-O(9)iii  | 167.28(10) | O(3)i-Cd(1)-O(9)iii  | 85.50(9)   | O(9)iii-Cd(1)-O(8)iii | 52.42(8)   |
| O(1)iv-Cd(2)-O(4)   | 102.64(11) | O(10)-Cd(2)-O(4)     | 90.74(11)  | O(1)iv-Cd(2)-O(10)    | 83.03(11)  |
| O(6)v-Cd(2)-O(4)    | 99.35(11)  | O(1)iv-Cd(2)-O(6)v   | 81.08(10)  | O(6)v-Cd(2)-O(10)     | 162.70(11) |
| O(9)vi-Cd(2)-O(4)   | 152.90(9)  | O(9)vi-Cd(2)-O(1)iv  | 103.24(10) | O(9)vi-Cd(2)-O(10)    | 84.54(9)   |
| O(9)vi-Cd(2)-O(6)v  | 92.47      | O(9)v-Cd(2)-O(4)     | 90.94(9)   | O(9)v-Cd(2)-O(1)iv    | 154.64(9)  |
| O(9)v-Cd(2)-O(10)   | 118.53(9)  | O(9)v-Cd(2)-O(6)v    | 75.60(8)   | O(9)v-Cd(2)-O(9)vi    | 68.40(9)   |

Symmetry transformations used to generate equivalent atoms: i:  $x - 1/2, -y + 3/2, z - 1/2$ ; ii:  $x - 1, -y, z$ ; iii:  $-x + 3/2, y + 1/2, -z + 3/2$ ; iv:  $x + 3/2, -y + 3/2, z + 1/2$  for **1**; i:  $-x + 1/2, y + 1/2, -z + 1/2$ ; ii:  $x - 1/2, -y + 3/2, z + 1/2$ ; iii:  $-x + 1/2, y + 1/2, -z - 1/2$ ; iv:  $x + 1/2, -y + 3/2, z + 1/2$ ; v:  $x, y, z + 1$ ; vi:  $-x + 1, -y + 1, -z$ .) for **2**.

**Table S3.** Hydrogen bond lengths (Å) and angles (°) of compound **2**.

| D-H...A             | <i>d</i> (D-H) | <i>d</i> (H...A) | <i>d</i> (D...A) | ∠DHA   |
|---------------------|----------------|------------------|------------------|--------|
| O(10)-H(1W)···N(2)i | 0.853          | 1.893            | 2.728            | 165.76 |
| O(10)-H(2W)···O(7)i | 0.853          | 2.070            | 2.757            | 137.11 |

Symmetry code: i:  $-x+1/2, y+1/2, -z+1/2$ .



**Table S4** Substrate scope for Zn-catalyzed the Knoevenagel reaction of substituted benzaldehydes with malononitrile <sup>a</sup>

| Entry | Substituted benzaldehyde substrate (R-C <sub>6</sub> H <sub>4</sub> CHO) | Product Yield <sup>b</sup> , % |
|-------|--------------------------------------------------------------------------|--------------------------------|
| 1     | R = H                                                                    | 100                            |
| 2     | R = 2-NO <sub>2</sub>                                                    | 100                            |
| 3     | R = 3-NO <sub>2</sub>                                                    | 100                            |
| 4     | R = 4-NO <sub>2</sub>                                                    | 100                            |
| 5     | R = 4-Cl                                                                 | 100                            |
| 6     | R = 4-OH                                                                 | 37                             |
| 7     | R = 4-CH <sub>3</sub>                                                    | 98                             |
| 8     | R = 4-OCH <sub>3</sub>                                                   | 68                             |

<sup>a</sup> Reaction conditions: aldehyde (0.5 mmol), malononitrile (1.0 mmol), catalyst **1** (2.0 mol%), and CH<sub>2</sub>Cl<sub>2</sub> (1.0 mL) at 25°C. <sup>b</sup> Calculated by <sup>1</sup>H NMR spectroscopy.

**Table S5.** Comparison of various catalysts for the Knoevenagel condensation reaction between benzaldehyde and propanedinitrile.

| Entry | Catalyst                                                                                                                                               | Catalyst (mol%) | Solvent            | Time (h) | Temp. (°C) | Conversion (%) | Ref.      |
|-------|--------------------------------------------------------------------------------------------------------------------------------------------------------|-----------------|--------------------|----------|------------|----------------|-----------|
| 1     | $[\text{Zn}_2(\mu_4\text{-dppa})(\mu\text{-dpe})(\mu\text{-H}_2\text{O})]_n \cdot n\text{H}_2\text{O}$                                                 | 2               | MeOH               | 1        | RT         | 100            | This work |
| 2     | $\text{Zn}_3(\text{OH})(\text{ATTCA})_2(\text{H}_2\text{O})] \cdot \text{C}_2\text{H}_6\text{NH}_2 \cdot 4\text{DMF} \cdot \text{H}_2\text{O}$         | 10              | DCM                | 5        | RT         | 94             | 48        |
| 3     | $[\text{Zn}_3(\text{L})_2(\mu_2\text{-OH})_2]_n$                                                                                                       | 4               | H <sub>2</sub> O   | 8        | 90         | 78             | 49        |
| 4     | $[\text{Zn}_2(\text{TCA})(\text{BIB})_{2.5}] \cdot (\text{NO}_3)$                                                                                      | 0.3             | —                  | 1        | 60         | 99             | 28        |
| 5     | $\{[\text{Zr}_6(\mu_3\text{-O})_4(\mu_3\text{-OH})_4(\text{OH})_4(\text{H}_2\text{O})_4(\text{DCBA})_2] \cdot 5\text{DMF} \cdot 3\text{H}_2\text{O}\}$ | 10              | DCM                | 5        | RT         | 89             | 47        |
| 6     | $\{[\text{Ba}_3\text{Zn}_4(\text{TDP})_2(\text{HCO}_2)_2(\text{OH}_2)_2] \cdot 7\text{DMF} \cdot 4\text{H}_2\text{O}\}_n$                              | 3               | Ethanol            | 1        | 60         | 99             | 44        |
| 7     | $\{[\text{Zn}(\text{L})(\text{bpfp})](\text{H}_2\text{O})_3\}_n$                                                                                       | 5               | DMF                | 3        | 35         | 98             | 26        |
| 8     | $[\text{Zn}(\text{L})(\text{H}_2\text{O})_2]_n \cdot n(\text{N-methylformamide})]$                                                                     | 3               | MeOH               | 1.5      | 40         | 75             | 50        |
| 9     | $[\text{PbL}_2] \cdot 2\text{DMF} \cdot 6\text{H}_2\text{O}$                                                                                           | 3               | CH <sub>3</sub> CN | 24       | RT         | >99            | 51        |
| 10    | $[\text{Co}_2(\text{tdc})_2(\text{tpxn})] \cdot 6\text{H}_2\text{O}\}_n$                                                                               | 2               | MeOH               | 1        | 25-30      | 96             | 52        |
| 11    | $[\text{Zn}(\text{L}1)(\text{NMeF})]_n \cdot n(\text{NMeF})$                                                                                           | 3               | H <sub>2</sub> O   | 6        | 50         | >99            | 53        |
| 12    | $\{[\text{Cd}(\text{Py}_2\text{TTz})(2\text{-NH}_2\text{-BDC})] \cdot (\text{DMF}) \cdot 0.5(\text{H}_2\text{O})\}_n$                                  | 2               | —                  | 6        | 60         | 99.8           | 27        |
| 13    | $[\text{Zn}_{15}(\text{mbpz})_6(\text{Hmbpz})_6(\text{L-NO}_2)_4(\text{HL-NO}_2)_2(\mu_3\text{-OH})_2]_n$                                              | 0.6             | —                  | 1        | 80         | >99            | 54        |

Linkers in coordination polymer catalysts: H<sub>3</sub>ATTCA: 2-amino[1,1:3,1'-terphenyl]-4,4,5-tricarboxylic acid; H<sub>2</sub>L: 2-(hydroxymethyl)-1H-benzo[d]imidazole-5-carboxylic acid; H<sub>3</sub>TCA: tricarboxytriphenyl amine, BIB: 1,3-bis(imidazol-1-ylmethyl)benzene; H<sub>4</sub>DCBA: 4'',6'-diamino-5'',5'''-bis(4-carboxyphenyl)-[1,1':3',1'':3'',1'''-quaterphenyl]-4,4'''-dicarboxylic acid; H<sub>6</sub>TDP: 2,4,6-tri(2,4-dicarboxyphenyl)pyridine; H<sub>2</sub>L: methyl-3-hydroxy-5-carboxy-2-thiophenecarboxylate, bpfp: bis(4-pyridylformyl)piperazine; L: 5-acetamidoisophthalic acid; HL: N-(4-carboxyphenyl)isonicotinamide 1-oxide; tpxn: N,N'-(1,4-phenylenebis(methylene))bis(1-(pyridin-2-yl)-N-(pyridin-2-ylmethyl)methanamine, H<sub>2</sub>tdc: thiophene-2,5-dicarboxylic acid; H<sub>2</sub>L1: 5-((pyren-4-ylmethyl)amino)isophthalic acid; 2-NH<sub>2</sub>-H<sub>2</sub>BDC: 2-amino-1,4-benzenedicarboxylic acid, Py<sub>2</sub>TTz: 2,5-bis(4-pyridyl)thiazolo[5,4-d]thiazole; H<sub>2</sub>mbpz: 3,3',5,5'-Tetramethyl-4,4'-bi-1H-pyrazole, H<sub>2</sub>L-NO<sub>2</sub>: 2,2'-Dinitro-[1,1'-biphenyl]-4,4'-dicarboxylic acid.
